# Supplementary material for: Multi-instrument comparison and compilation of non-methane organic gas emissions from biomass burning and implications for smoke-derived secondary organic aerosol precursors
Source: Copernicus journal article supplement (doi:10.5194/acp-17-1471-2017), 2017-01-31
Supplement: Supplementary file 1 [file acp-17-1471-2017-supplement.zip]

## Methods

### Sampling periods

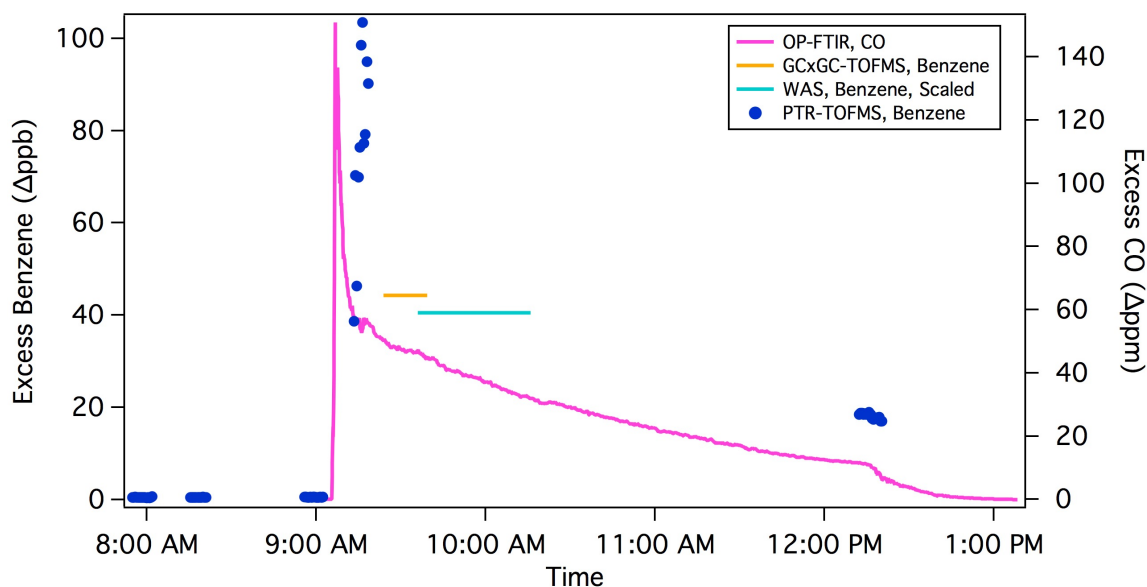

Figure S1. Sampling times for each instrument during the Chinese rice straw fire.

Figure S1 shows the relative sampling times for each instrument during the straw burn. Although the WAS canister was filled in under one minute, the sampling period corresponds to the approximate time that the smoke from the combustion chamber was injected into the smog chamber. For comparison to the room burn data, the WAS-measured benzene concentration was scaled by the smog chamber dilution ratio (~25), calculated as the ratio of the CO concentration measured by OP-FTIR in the combustion chamber averaged over the same period relative to the WAS-measured CO concentration in the smog chamber.

With the exception of the pine burn (for which the PTR-TOFMS sampled more frequently), all burns were similar to the Fig. S1 case, in which there was very little overlap between the PTR-TOFMS measurement period and GC×GC-TOFMS or WAS sampling periods. The GC×GC-TOFMS and WAS samples represent smoke that was well mixed. The PTR-TOFMS measured the initial rise in smoke concentration and briefly, the more well-mixed smoke at the end; in between, the PTR-TOFMS sampled from the smog chambers. The slight time difference between the peak concentrations measured by OP-FTIR and PTR-TOFMS demonstrates that there was a small time delay between the smoke reaching the OP-FTIR positioned on the platform and the instruments located in the control room (See section 2).

### GC×GC-TOFMS Analysis

For the spruce smoke sample (burn 155), replicate samples were analyzed on two different column sets with two different GC methods: (1) a DB-VRX primary column (30 m, 0.25 mm I.D., 1.4  $\mu$ m film, Agilent, Santa Clara, CA) and a Stabilwax secondary column (1.5 m, 0.25 mm I.D., 0.5  $\mu$ m film, Restek, Bellefonte, PA). The primary oven temperature program was 45 °C for 5 min, 4 °C/min to 235 °C, 235 °C for 2.5 min; the secondary oven was set to 10 °C above the primary oven, which was 5 °C cooler than used in the analysis of samples from the other three fuels on this column set (Hatch et al., 2015). The injection split ratio was 10:1. (2) A Rxi-5ms primary column (30 m, 0.25 mm I.D., 0.25  $\mu$ m film, Restek, Bellefonte, PA) with a Rxi-17Sil MS (1.5 m, 0.15 mm I.D., 0.15  $\mu$ m film, Restek, Bellefonte, PA) secondary column. The primary oven was held at 45 °C for 5 min, ramped at 6 °C/min to 305 °C and held at 305 °C for 1 min; the secondary oven temperature was 15 °C above the primary oven temperature. The injection split ratio was 6:1. The same ~275 standard compounds were also analyzed under set #2, however with a 12:1 injection split ratio; therefore the analyte peak areas were scaled down by a factor of

2. Comparisons between the chromatograms resulting from each column set indicated that polar compounds in this sample (e.g., phenols) were underestimated by column set #1 due to the lower secondary oven temperature than was used in the standard analysis on column set #1. Calibration of hydrocarbons was assumed to be unaffected by the lower oven temperature, as supported by the agreement with other instruments. Because the chromatographic separation of light compounds was much better in set #1, data from set #2 were used for polar compounds only.

## Results & Discussion

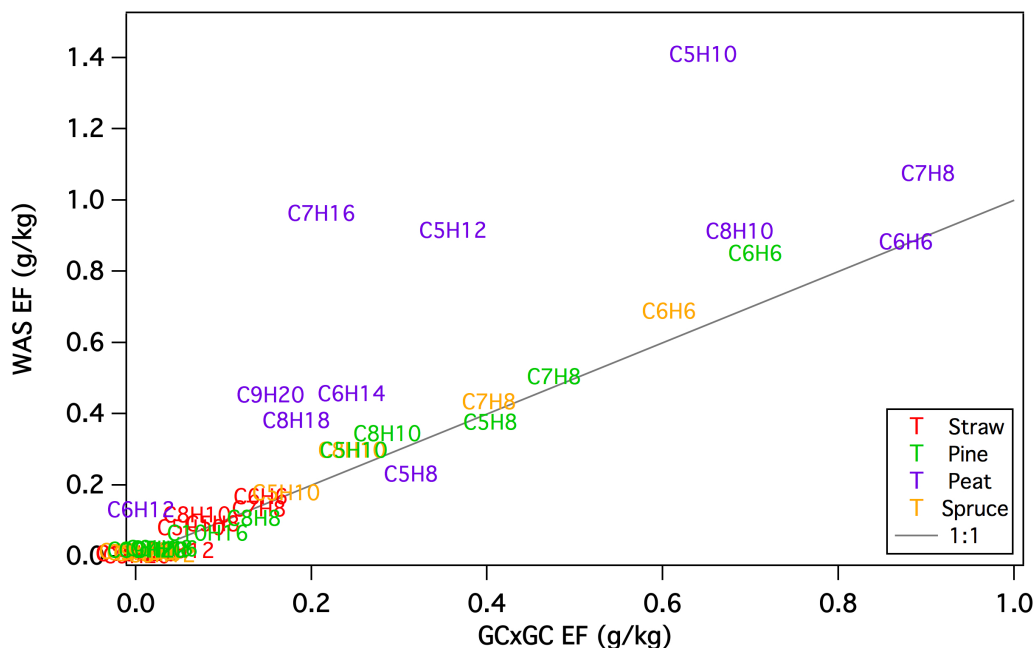

Figure S2. Comparison of WAS and GC×GC-TOFMS emission factors. EFs were summed over overlapping isomers only.

Emission factors measured by WAS and GC×GC-TOFMS agree well for all burns except peat (Fig. S2). In the peat burn, the largest deviations occurred for alkanes (i.e.,  $C_5H_{12}$ ,  $C_7H_{16}$ ,  $C_9H_{20}$ ,  $C_6H_{14}$ ,  $C_8H_{18}$ ) and pentene isomers ( $C_5H_{10}$ ). Although both techniques measured monoterpenes during the peat burn, none of the measured isomers overlapped and thus no comparison is included.

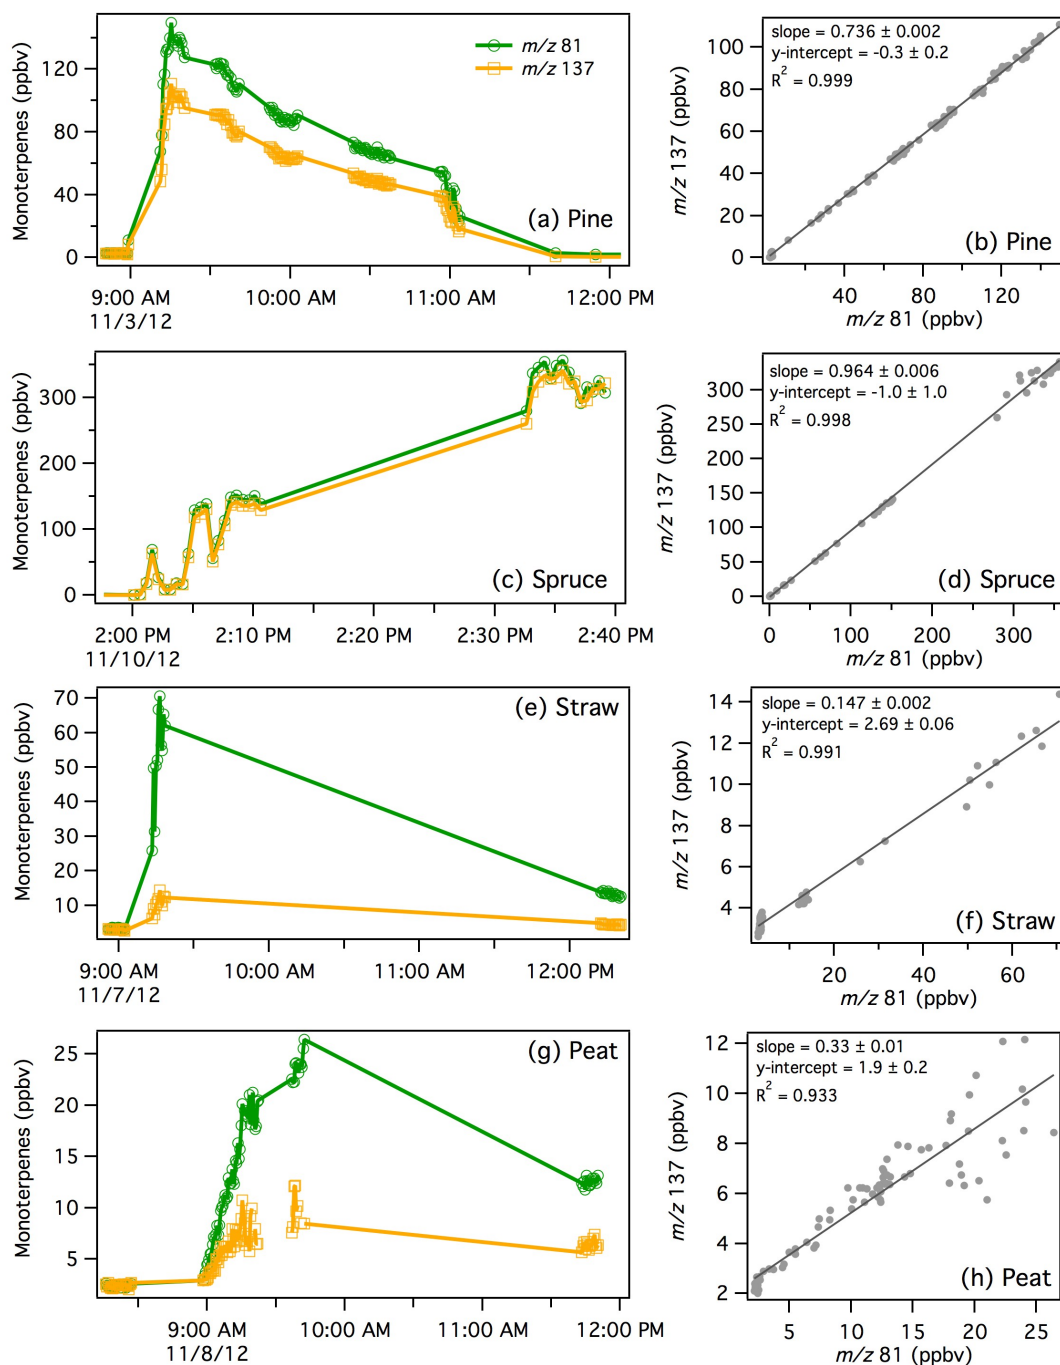

**Figure S3. Comparison of the monoterpene ions,  $m/z$  137 and  $m/z$  81, measured by PTR-TOFMS. The time series for each ion is shown the left column. Correlation plots between  $m/z$  137 and  $m/z$  81 for each fuel are given in the right column.**

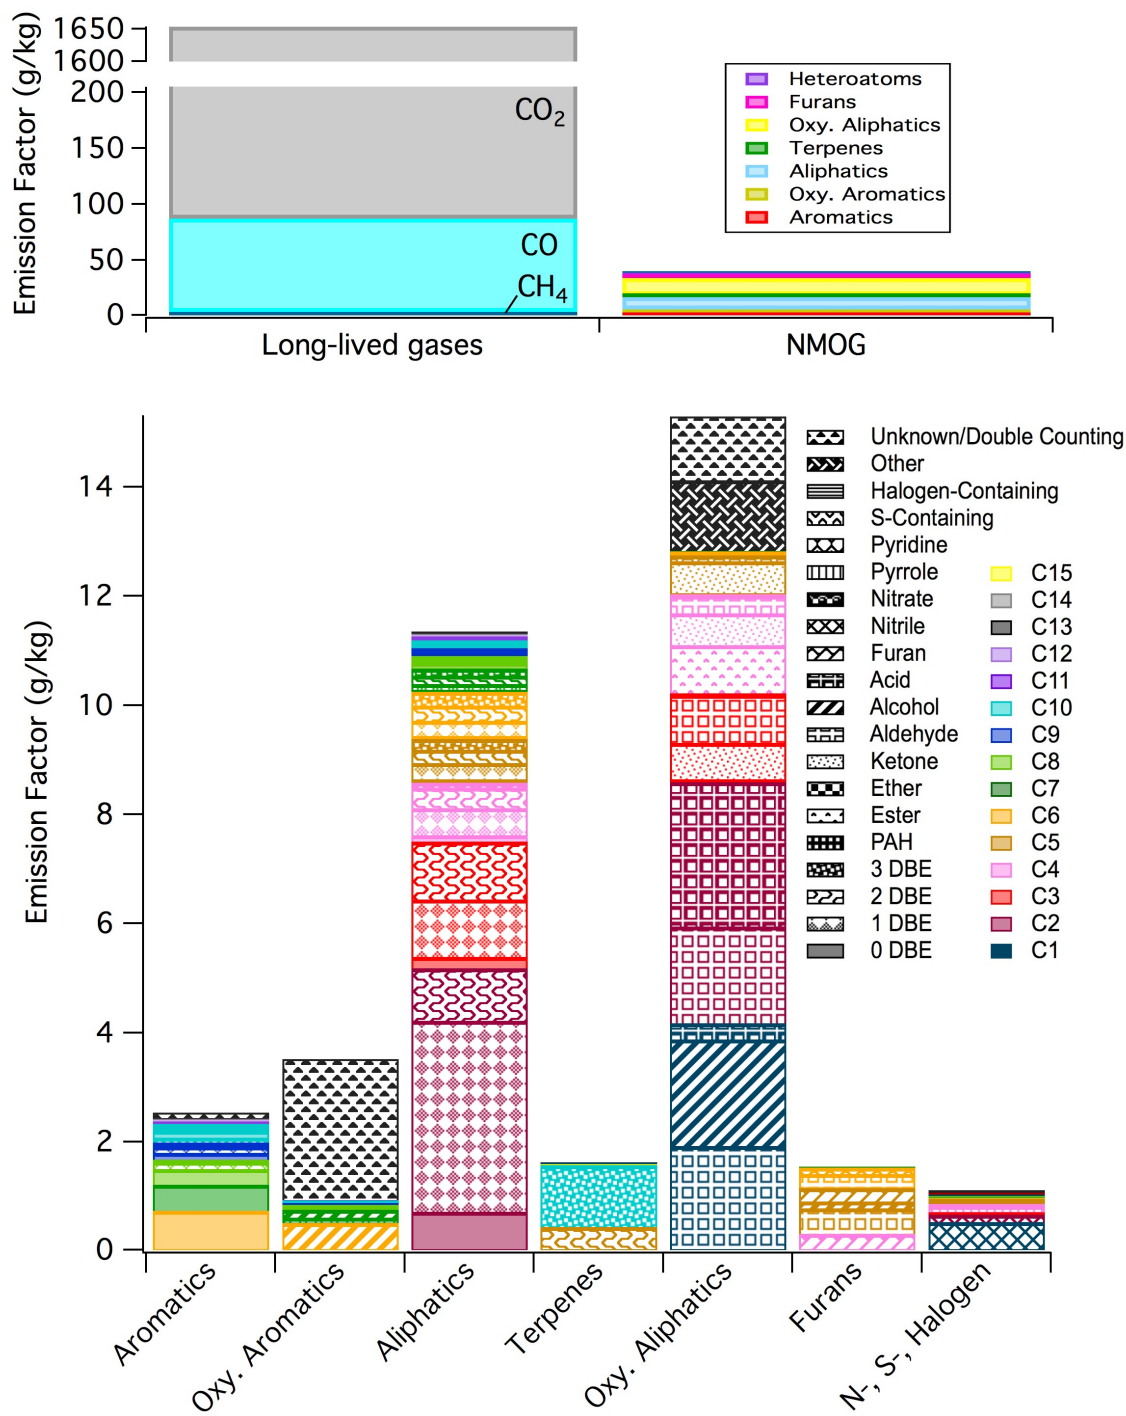

Figure S4. Gas-phase emission factors from a ponderosa pine fire. Top panel: long-lived gases compared to NMOG. Bottom panel: Speciation of NMOG; colors represent carbon number and patterns indicate functionality.

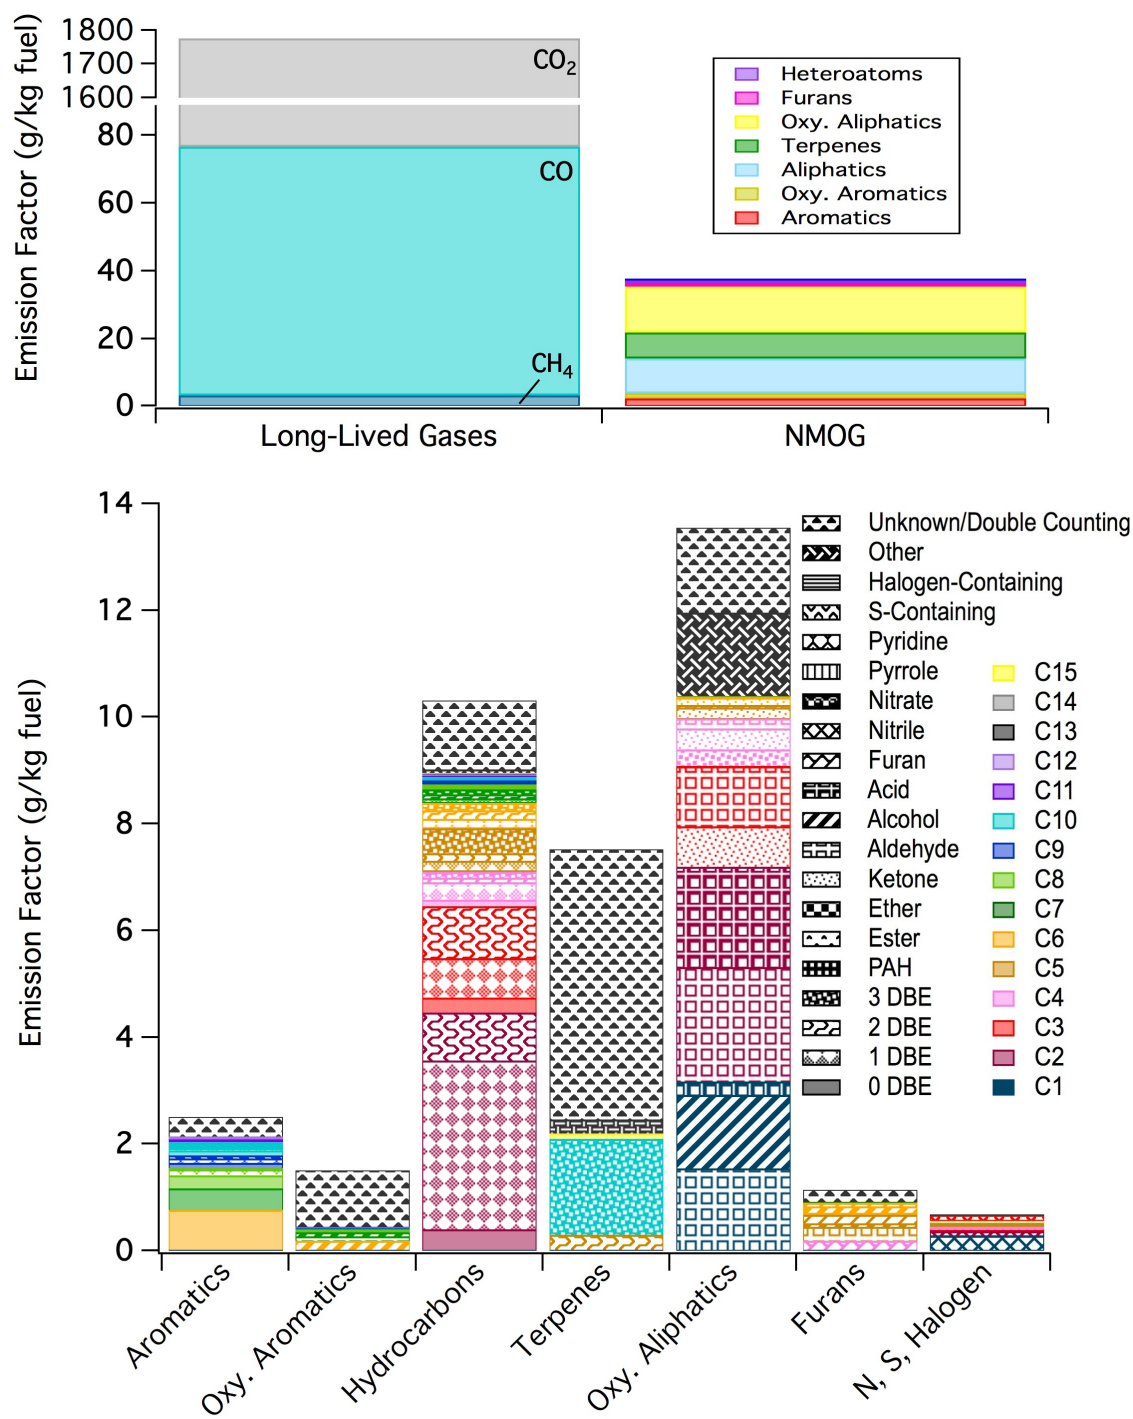

Figure S5. As in Fig. S4 but for a black spruce fire.

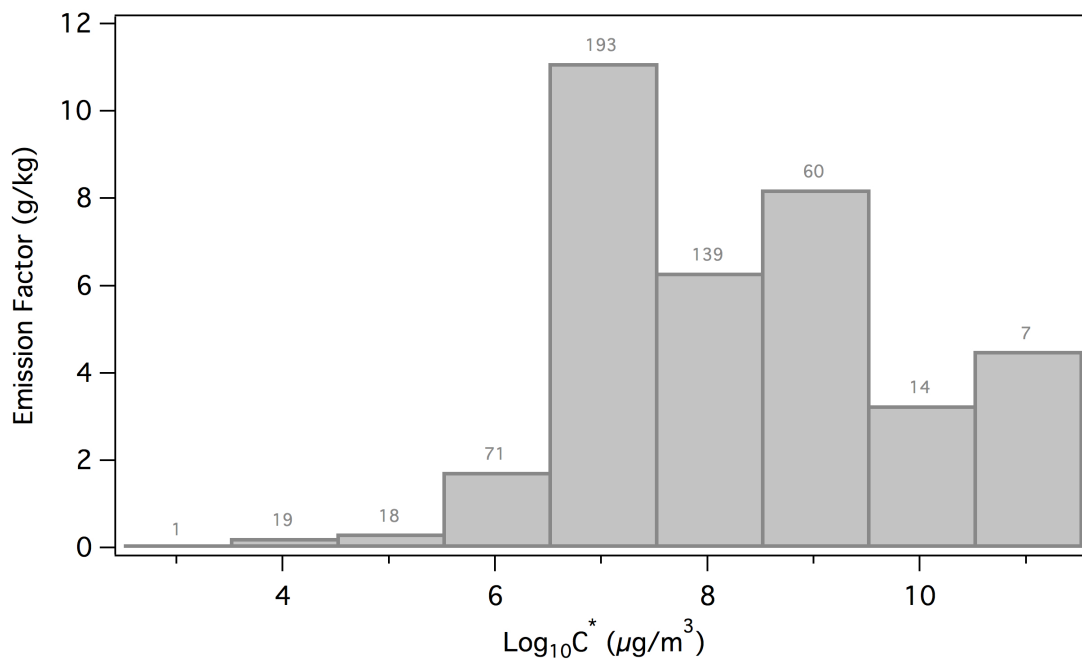

Figure S6. Emission factors of NMOG determined in black spruce smoke, as a function of volatility. The number of compounds included in each bin is indicated above the bars.

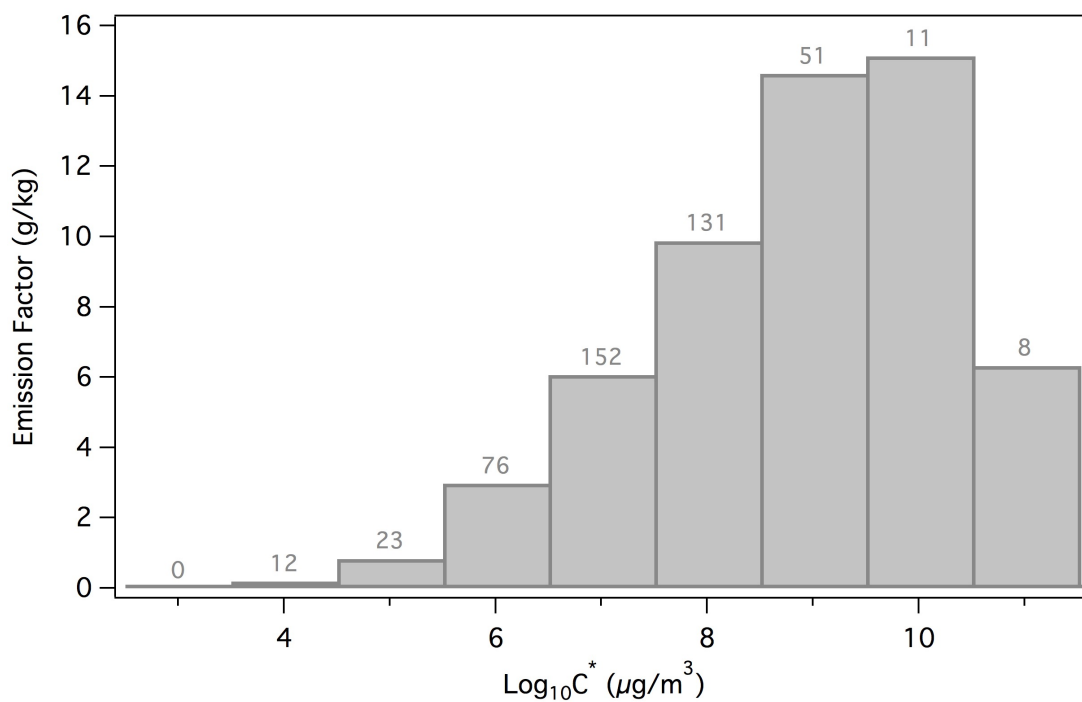

Figure S7. As in Fig. S6 but for an Indonesian peat fire.

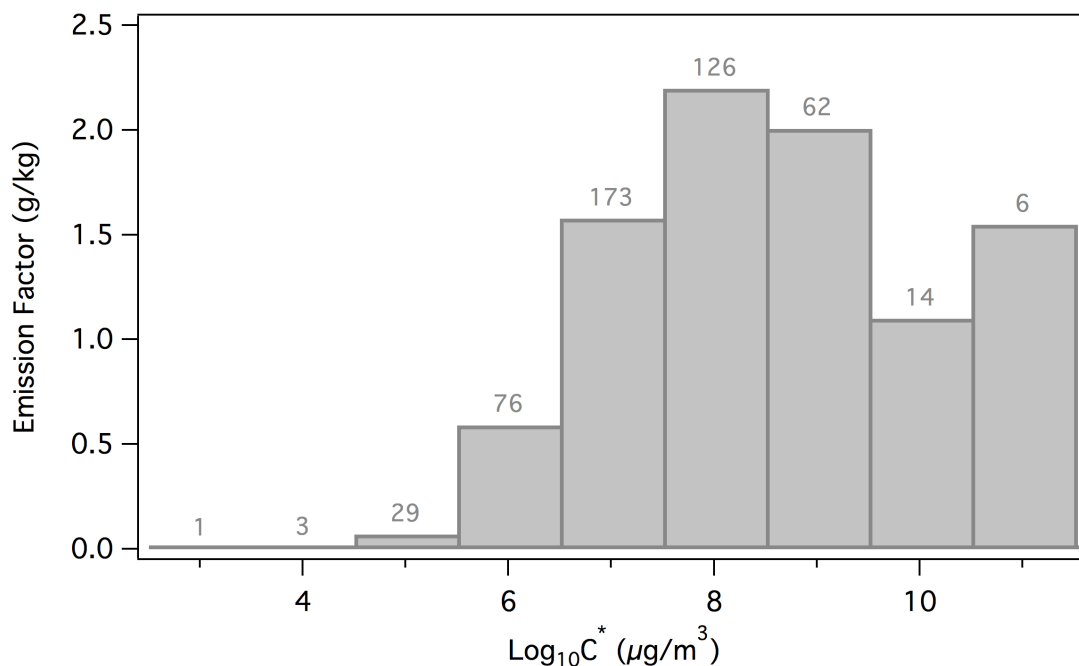

Figure S8. As in Fig. S6 but for a Chinese rice straw fire.

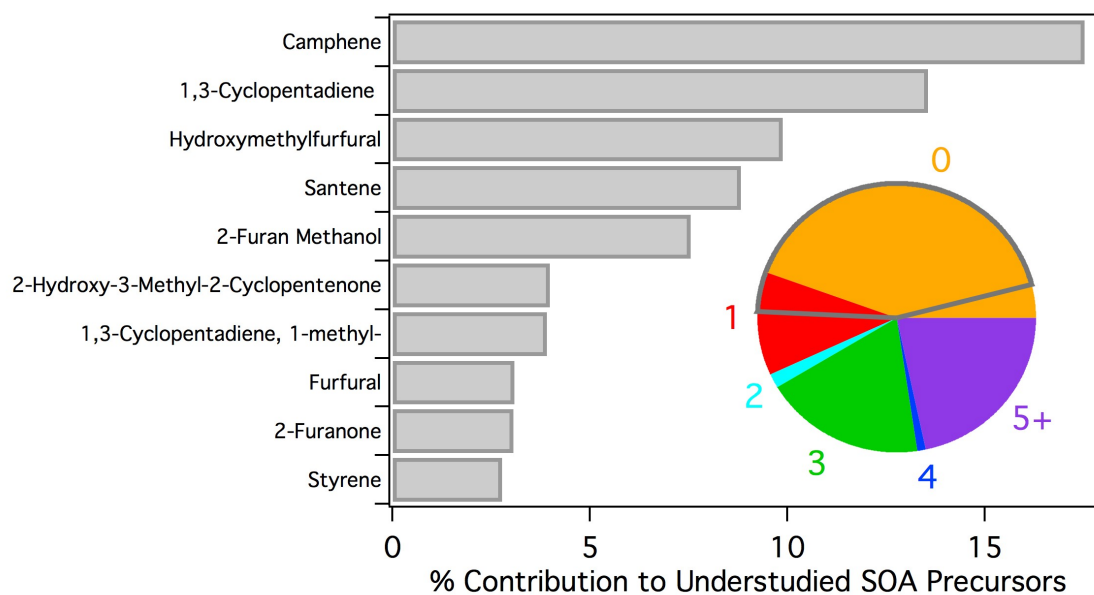

Figure S9. Assessment of SOA yields for compounds observed in the black spruce fire. Pie chart: Classification of reactive carbon (see Section 3.3.2 of main text) by the number of publications reporting an SOA yield following hydroxyl radical oxidation. The gray-outlined wedge represents the understudied compounds with the most potential to form SOA. Bar chart: Percent contribution of the top 10 compounds included in the gray wedge.

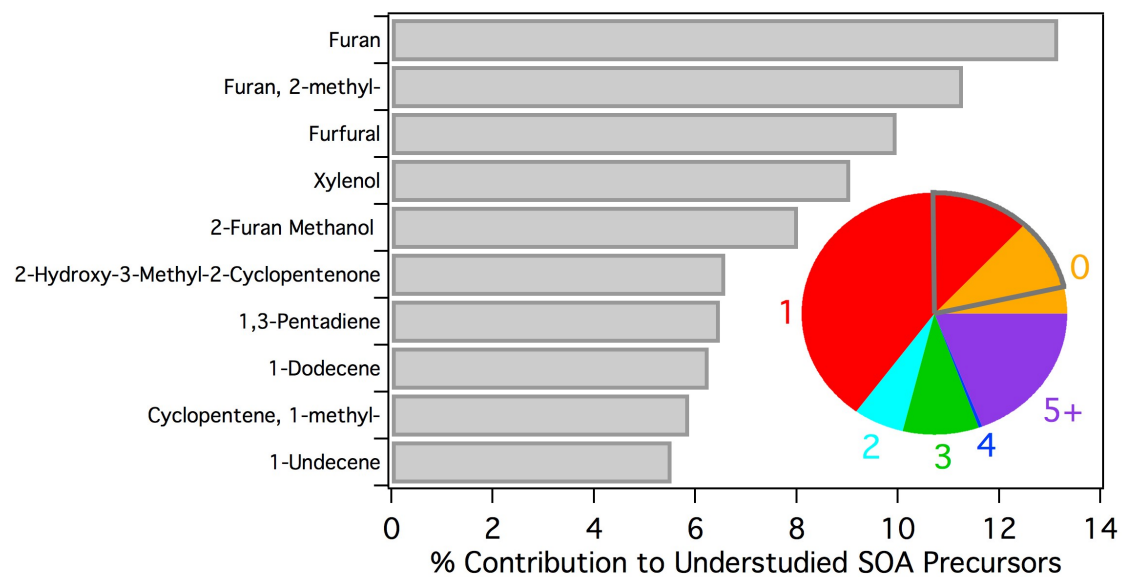

**Figure S10.** As in Fig. S9 but for an Indonesian peat fire.



**Table S2. References and classifications used in the SOA yield assessment**

| # of Pubs.                    | Compound                      | Potential Precursor? <sup>a</sup> | SOA Yield References                                                                                                                                                                                                                                                 |
|-------------------------------|-------------------------------|-----------------------------------|----------------------------------------------------------------------------------------------------------------------------------------------------------------------------------------------------------------------------------------------------------------------|
| <i>Well-studied Compounds</i> |                               |                                   |                                                                                                                                                                                                                                                                      |
| ≥5                            | Isoprene                      |                                   | (Bregonzio-Rozier et al., 2015; Chan et al., 2010; Chen and Jang, 2012; Chhabra et al., 2010; Kleindienst et al., 2006; Kroll et al., 2006; Lambe et al., 2015; Lee et al., 2006; Nguyen et al., 2011; Pandis et al., 1991; Sato et al., 2011; Surratt et al., 2007) |
|                               | Limonene                      |                                   | (Griffin et al., 1999; Hoffmann et al., 1997; Jaoui et al., 2006; Lee et al., 2006; Mutzel et al., 2016; Zhao et al., 2015)                                                                                                                                          |
|                               | α-Pinene                      |                                   | (Bruns et al., 2015; Eddingsaas et al., 2012; Hoffmann et al., 1997; Kleindienst et al., 2006; Lambe et al., 2015; Lee et al., 2006; Mutzel et al., 2016; Ng et al., 2007a; Odum et al., 1996; Takekawa et al., 2003; Yu et al., 2008; Zhao et al., 2015)            |
|                               | β-Pinene                      |                                   | (Griffin et al., 1999; Hoffmann et al., 1997; Lee et al., 2006; Mutzel et al., 2016; Pandis et al., 1991; Zhao et al., 2015)                                                                                                                                         |
|                               | Benzene                       |                                   | (Borras and Tortajada-Genaro, 2012; Li et al., 2016; Martin-Reviejo and Wirtz, 2005; Nakao et al., 2011; Ng et al., 2007b)                                                                                                                                           |
|                               | Toluene                       |                                   | (Chhabra et al., 2010; Hildebrandt et al., 2009; Kamens et al., 2011; Li et al., 2016; Nakao et al., 2011; Ng et al., 2007b; Odum et al., 1997; Ruiz et al., 2015; Takekawa et al., 2003; Wang et al., 1992; Zhou et al., 2011)                                      |
|                               | <i>m</i> - & <i>p</i> -Xylene |                                   | (Chhabra et al., 2010; Li et al., 2016; Nakao et al., 2011; Ng et al., 2007b; Odum et al., 1996; Odum et al., 1997; Takekawa et al., 2003; Zhou et al., 2011)                                                                                                        |
|                               | Naphthalene                   |                                   | (Chan et al., 2009; Chen et al., 2016; Chhabra et al., 2010; Kleindienst et al., 2012; Shakya and Griffin, 2010)                                                                                                                                                     |
| 4                             | Methyl Naphthalenes           |                                   | (Chan et al., 2009; Chen et al., 2016; Kleindienst et al., 2012; Shakya and Griffin, 2010)                                                                                                                                                                           |
|                               | Decane                        |                                   | (Hunter et al., 2014; Lambe et al., 2012; Lim and Ziemann, 2009; Presto et al., 2010)                                                                                                                                                                                |
| 3                             | β-Myrcene                     |                                   | (Boge et al., 2013; Griffin et al., 1999; Lee et al., 2006)                                                                                                                                                                                                          |
|                               | 3-Carene                      |                                   | (Griffin et al., 1999; Hoffmann et al., 1997; Lee et al., 2006)                                                                                                                                                                                                      |
|                               | 1,3-Butadiene                 |                                   | (Angove et al., 2006; Jaoui et al.,                                                                                                                                                                                                                                  |

|                               |                          |   |                                                                           |
|-------------------------------|--------------------------|---|---------------------------------------------------------------------------|
|                               |                          |   | 2014; Sato et al., 2011)                                                  |
|                               | 1-Octene                 |   | (Forstner et al., 1997; Matsunaga et al., 2009; Wang et al., 1992)        |
|                               | Dodecane                 |   | (Lim and Ziemann, 2009; Loza et al., 2014; Presto et al., 2010)           |
|                               | <i>o</i> -Xylene         |   | (Odum et al., 1997; Vivanco et al., 2011; Zhou et al., 2011)              |
|                               | Methacrolein             |   | (Bregonzio-Rozier et al., 2015; Chan et al., 2010; Zhang et al., 2012)    |
|                               | Phenol                   |   | (Borras and Tortajada-Genaro, 2012; Nakao et al., 2011; Yee et al., 2013) |
| 2                             | Ethylbenzene             |   | (Odum et al., 1997; Stern et al., 1987)                                   |
|                               | 1-Decene                 |   | (Forstner et al., 1997; Matsunaga et al., 2009)                           |
|                               | Undecane                 |   | (Lim and Ziemann, 2009; Takekawa et al., 2003)                            |
|                               | Phenol, 2-methyl         |   | (Henry et al., 2008; Nakao et al., 2011)                                  |
|                               | <i>o</i> -Guaiacol       |   | (Lauraguais et al., 2014; Yee et al., 2013)                               |
|                               | Catechol                 |   | (Borras and Tortajada-Genaro, 2012; Nakao et al., 2011)                   |
| <i>Understudied Compounds</i> |                          |   |                                                                           |
| 1                             | Styrene                  | Y | (Jia and Xu, 2010)                                                        |
|                               | Benzene, 1,2,4-Trimethyl | Y | (Takekawa et al., 2003)                                                   |
|                               | 1-Undecene               | Y | (Matsunaga et al., 2009)                                                  |
|                               | 1-Dodecene               | Y | (Matsunaga et al., 2009)                                                  |
|                               | Furan                    | Y | (Gómez Alvarez et al., 2009)                                              |
|                               | Furan, 2-methyl          | Y | (Gómez Alvarez et al., 2009)                                              |
|                               | Xylenol                  | Y | (Nakao et al., 2011)                                                      |
|                               | Ethane                   |   | (Lim and Ziemann, 2009) <sup>b</sup>                                      |
|                               | Propane                  |   | (Lim and Ziemann, 2009) <sup>b</sup>                                      |
|                               | <i>n</i> -Butane         |   | (Lim and Ziemann, 2009) <sup>b</sup>                                      |
|                               | <i>n</i> -Pentane        |   | (Lim and Ziemann, 2009) <sup>b</sup>                                      |
|                               | Hexane                   |   | (Lim and Ziemann, 2009)                                                   |
|                               | 2,3-Dimethyl Butane      |   | (Lim and Ziemann, 2009) <sup>b</sup>                                      |
|                               | 2-Methyl Pentane         |   | (Lim and Ziemann, 2009) <sup>b</sup>                                      |
|                               | Heptane                  |   | (Lim and Ziemann, 2009)                                                   |
|                               | 2-Methyl Hexane          |   | (Lim and Ziemann, 2009) <sup>b</sup>                                      |
|                               | 3-Methyl Hexane          |   | (Lim and Ziemann, 2009) <sup>b</sup>                                      |
|                               | Octane                   |   | (Lim and Ziemann, 2009) <sup>b</sup>                                      |
|                               | Ethene                   |   | (Matsunaga et al., 2009) <sup>b</sup>                                     |
|                               | Propene                  |   | (Matsunaga et al., 2009) <sup>b</sup>                                     |
|                               | 1-Butene                 |   | (Matsunaga et al., 2009) <sup>b</sup>                                     |
|                               | <i>i</i> -Butene         |   | (Matsunaga et al., 2009) <sup>b</sup>                                     |
|                               | <i>trans</i> -2-Butene   |   | (Matsunaga et al., 2009) <sup>b</sup>                                     |
|                               | <i>cis</i> -2-Butene     |   | (Matsunaga et al., 2009) <sup>b</sup>                                     |
|                               | 1-Pentene                |   | (Matsunaga et al., 2009) <sup>b</sup>                                     |
|                               | 2-Pentene, ( <i>Z</i> )- |   | (Matsunaga et al., 2009) <sup>b</sup>                                     |
|                               | 2-Pentene, ( <i>E</i> )- |   | (Matsunaga et al., 2009) <sup>b</sup>                                     |
|                               | 2-Methyl-2-Butene        |   | (Matsunaga et al., 2009) <sup>b</sup>                                     |
|                               | 2-Methyl-1-Butene        |   | (Matsunaga et al., 2009) <sup>b</sup>                                     |
|                               | 3-Methyl-1-Butene        |   | (Matsunaga et al., 2009) <sup>b</sup>                                     |
|                               | 1-Hexene                 |   | (Matsunaga et al., 2009) <sup>b</sup>                                     |
|                               | 1-Heptene                |   | (Matsunaga et al., 2009) <sup>b</sup>                                     |

|   |                                |                          |
|---|--------------------------------|--------------------------|
|   | 1-Nonene                       | (Matsunaga et al., 2009) |
|   | Acetylene                      | (Volkamer et al., 2009)  |
|   | 2-Butenal                      | (Chan et al., 2010)      |
|   | Acrolein                       | (Chan et al., 2010)      |
| 0 | Cyclopentene                   | Y                        |
|   | 1,4-Pentadiene                 | Y                        |
|   | 1,3-Pentadiene, (E)            | Y                        |
|   | 1,3-Cyclopentadiene            | Y                        |
|   | Cyclopentene, 1-Methyl         | Y                        |
|   | 1,3-Cyclopentadiene, 1-methyl  | Y                        |
|   | 1,3-Cyclopentadiene, 5-methyl- | Y                        |
|   | 1,3-Cyclohexadiene             | Y                        |
|   | 1,3-Pentadiene, 2-methyl-, (Z) | Y                        |
|   | Benzene, 1-ethenyl-3-methyl-   | Y                        |
|   | <i>p</i> -Cymene               | Y                        |
|   | Indene                         | Y                        |
|   | Santene                        | Y                        |
|   | Camphene                       | Y                        |
|   | Tricyclene                     | Y                        |
|   | Hydroxymethylfurfural          | Y                        |
|   | 2-Furanone                     | Y                        |
|   | Furfural                       | Y                        |
|   | 5-Methyl Furfural              | Y                        |
|   | 2-Furfuryl alcohol             | Y                        |
|   | Furan, 2,5-dimethyl            | Y                        |
|   | Furan, 2-Acetyl                | Y                        |
|   | Benzofuran                     | Y                        |
|   | Cyclopentanone                 | Y                        |
|   | 2-Cyclopenten-1-one            | Y                        |
|   | 2,4-Cyclopentadiene-1-one      | Y                        |
|   | 2-Cyclopenten-1-one, 2-Methyl  | Y                        |
|   | 2-Hydroxy-3-Methyl-2-          | Y                        |
|   | Cyclopentenone                 | Y                        |
|   | Benzaldehyde                   | Y                        |
|   | Vinylphenol                    | Y                        |
|   | Salicylaldehyde                | Y                        |
|   | Bornyl Acetate                 | Y                        |
|   | Pyrrole                        | Y                        |
|   | Pyridine                       | Y                        |
|   | Benzonitrile                   | Y                        |
|   | Propyne                        |                          |
|   | Butenyne                       |                          |
|   | Cyclopentane                   |                          |
|   | Formaldehyde                   |                          |
|   | Acetaldehyde                   |                          |
|   | Propanal                       |                          |
|   | Propanal, 2-Methyl             |                          |
|   | Butanal                        |                          |
|   | Butanal, 2-Methyl              |                          |
|   | Butanal, 3-Methyl              |                          |
|   | Ethyl Acetate                  |                          |
|   | Methylglyoxal                  |                          |
|   | 2-Propynal                     |                          |
|   | Glycolaldehyde                 |                          |
|   | Methanol                       |                          |

---

Methyl vinyl ketone  
3-Buten-2-one, 3-methyl-  
Acetone  
2-Butanone  
2,3-Butanedione  
2-Pentanone  
2,3-Pentanedione  
Hydroxyacetone  
Butyrolactone  
Formic acid  
Acetic Acid  
Acetic Acid, Methyl Ester  
Hydrogen Cyanide  
Acetonitrile  
Methyl chloride  
Carbonyl Sulfide

---

<sup>a</sup>Assessed only for understudied compounds (0-1 publication)

<sup>b</sup>Reported trends of SOA yield vs. carbon number were assumed to extend to compounds lighter than those tested in the cited publication.

## References:

- Angove, D. E., Fookes, C. J. R., Hynes, R. G., Walters, C. K., and Azzi, M.: The characterisation of secondary organic aerosol formed during the photodecomposition of 1,3-butadiene in air containing nitric oxide, *Atmos. Environ.*, 40, 4597-4607, DOI 10.1016/j.atmosenv.2006.03.046, 2006.
- Boge, O., Mutzel, A., Iinuma, Y., Yli-Pirila, P., Kahnt, A., Joutsensaari, J., and Herrmann, H.: Gas-phase products and secondary organic aerosol formation from the ozonolysis and photooxidation of myrcene, *Atmos. Environ.*, 79, 553-560, DOI 10.1016/j.atmosenv.2013.07.034, 2013.
- Borras, E., and Tortajada-Genaro, L. A.: Secondary organic aerosol formation from the photo-oxidation of benzene, *Atmos. Environ.*, 47, 154-163, DOI 10.1016/j.atmosenv.2011.11.020, 2012.
- Bregonzio-Rozier, L., Siekmann, F., Giorio, C., Pangui, E., Morales, S. B., Temime-Roussel, B., Gratien, A., Michoud, V., Ravier, S., Cazaunau, M., Tapparo, A., Monod, A., and Doussin, J. F.: Gaseous products and secondary organic aerosol formation during long term oxidation of isoprene and methacrolein, *Atmos. Chem. Phys.*, 15, 2953-2968, 10.5194/acp-15-2953-2015, 2015.
- Bruns, E. A., El Haddad, I., Keller, A., Klein, F., Kumar, N. K., Pieber, S. M., Corbin, J. C., Slowik, J. G., Brune, W. H., Baltensperger, U., and Prevot, A. S. H.: Inter-comparison of laboratory smog chamber and flow reactor systems on organic aerosol yield and composition, *Atmos. Meas. Tech.*, 8, 2315-2332, 10.5194/amt-8-2315-2015, 2015.
- Chan, A. W. H., Chan, M. N., Surratt, J. D., Chhabra, P. S., Loza, C. L., Crounse, J. D., Yee, L. D., Flagan, R. C., Wennberg, P. O., and Seinfeld, J. H.: Role of aldehyde chemistry and NO<sub>x</sub> concentrations in secondary organic aerosol formation, *Atmos. Chem. Phys.*, 10, 7169-7188, 2010.
- Chan, M. N., Kautzman, K. E., Chhabra, P. S., Surratt, J. D., Chan, M. N., Crounse, J. D., Kurten, A., Wennberg, P. O., Flagan, R. C., and Seinfeld, J. H.: Secondary organic aerosol formation from photooxidation of naphthalene and alkylnaphthalenes: implications for oxidation of intermediate volatility organic compounds (IVOCs), *Atmos. Chem. Phys.*, 9, 3049-3060, 2009.
- Chen, C. L., Kacarab, M., Tang, P., and Cocker, D. R.: SOA formation from naphthalene, 1-methylnaphthalene, and 2-methylnaphthalene photooxidation, *Atmos. Environ.*, 131, 424-433, 10.1016/j.atmosenv.2016.02.007, 2016.
- Chen, T. Y., and Jang, M.: Secondary organic aerosol formation from photooxidation of a mixture of dimethyl sulfide and isoprene, *Atmos. Environ.*, 46, 271-278, DOI 10.1016/j.atmosenv.2011.09.082, 2012.
- Chhabra, P. S., Flagan, R. C., and Seinfeld, J. H.: Elemental analysis of chamber organic aerosol using an aerodyne high-resolution aerosol mass spectrometer, *Atmos. Chem. Phys.*, 10, 4111-4131, 10.5194/acp-10-4111-2010, 2010.
- Eddingsaas, N. C., Loza, C. L., Yee, L. D., Chan, M., Schilling, K. A., Chhabra, P. S., Seinfeld, J. H., and Wennberg, P. O.: alpha-pinene photooxidation under controlled chemical conditions - Part 2: SOA yield and composition in low- and high-NO<sub>x</sub> environments, *Atmos. Chem. Phys.*, 12, 7413-7427, 10.5194/acp-12-7413-2012, 2012.
- Forstner, H. J. L., Flagan, R. C., and Seinfeld, J. H.: Molecular speciation of secondary organic aerosol from photooxidation of the higher alkenes: 1-octene and 1-decene, *Atmos. Environ.*, 31, 1953-1964, Doi 10.1016/S1352-2310(96)00356-1, 1997.
- Gómez Alvarez, E., Borrás, E., Viidanoja, J., and Hjorth, J.: Unsaturated dicarbonyl products from the OH-initiated photo-oxidation of furan, 2-methylfuran and 3-methylfuran, *Atmos. Environ.*, 43, 1603-1612, 10.1016/j.atmosenv.2008.12.019, 2009.

- Griffin, R. J., Cocker, D. R., Flagan, R. C., and Seinfeld, J. H.: Organic aerosol formation from the oxidation of biogenic hydrocarbons, *J. Geophys. Res.*, 104, 3555-3567, 1999.
- Hatch, L. E., Luo, W., Pankow, J. F., Yokelson, R. J., Stockwell, C. E., and Barsanti, K. C.: Identification and quantification of gaseous organic compounds emitted from biomass burning using two-dimensional gas chromatography-time-of-flight mass spectrometry, *Atmos. Chem. Phys.*, 15, 1865-1899, DOI 10.5194/acp-15-1865-2015, 2015.
- Henry, F., Coeur-Tourneur, C., Ledoux, F., Tomas, A., and Menu, D.: Secondary organic aerosol formation from the gas phase reaction of hydroxyl radicals with m-, o- and p-cresol, *Atmos. Environ.*, 42, 3035-3045, DOI 10.1016/j.atmosenv.2007.12.043, 2008.
- Hildebrandt, L., Donahue, N. M., and Pandis, S. N.: High formation of secondary organic aerosol from the photo-oxidation of toluene, *Atmos. Chem. Phys.*, 9, 2973-2986, 2009.
- Hoffmann, T., Odum, J. R., Bowman, F., Collins, D., Klockow, D., Flagan, R. C., and Seinfeld, J. H.: Formation of organic aerosols from the oxidation of biogenic hydrocarbons, *J. Atmos. Chem.*, 26, 189-222, Doi 10.1023/A:1005734301837, 1997.
- Hunter, J. F., Carrasquillo, A. J., Daumit, K. E., and Kroll, J. H.: Secondary Organic Aerosol Formation from Acyclic, Monocyclic, and Polycyclic Alkanes, *Environ. Sci. Technol.*, 48, 10227-10234, DOI 10.1021/es502674s, 2014.
- Jaoui, M., Corse, E., Kleindienst, T. E., Offenberg, J. H., Lewandowski, M., and Edney, E. O.: Analysis of secondary organic aerosol compounds from the photooxidation of d-limonene in the presence of NOX and their detection in ambient PM2.5, *Environ. Sci. Technol.*, 40, 3819-3828, DOI 10.1021/es052566z, 2006.
- Jaoui, M., Lewandowski, M., Docherty, K., Offenberg, J. H., and Kleindienst, T. E.: Atmospheric oxidation of 1,3-butadiene: characterization of gas and aerosol reaction products and implications for PM2.5, *Atmos. Chem. Phys.*, 14, 13681-13704, DOI 10.5194/acp-14-13681-2014, 2014.
- Jia, L., and Xu, Y. F.: Formation of Secondary Organic Aerosol from the Styrene-NOx Irradiation, *Acta Chim Sinica*, 68, 2429-2435, 2010.
- Kamens, R. M., Zhang, H. F., Chen, E. H., Zhou, Y., Parikh, H. M., Wilson, R. L., Galloway, K. E., and Rosen, E. P.: Secondary organic aerosol formation from toluene in an atmospheric hydrocarbon mixture: Water and particle seed effects, *Atmos. Environ.*, 45, 2324-2334, DOI 10.1016/j.atmosenv.2010.11.007, 2011.
- Kleindienst, T. E., Edney, E. O., Lewandowski, M., Offenberg, J. H., and Jaoui, M.: Secondary organic carbon and aerosol yields from the irradiations of isoprene and alpha-pinene in the presence of NOx and SO2, *Environ. Sci. Technol.*, 40, 3807-3812, DOI 10.1021/es052446r, 2006.
- Kleindienst, T. E., Jaoui, M., Lewandowski, M., Offenberg, J. H., and Docherty, K. S.: The formation of SOA and chemical tracer compounds from the photooxidation of naphthalene and its methyl analogs in the presence and absence of nitrogen oxides, *Atmos. Chem. Phys.*, 12, 8711-8726, DOI 10.5194/acp-12-8711-2012, 2012.
- Kroll, J. H., Ng, N. L., Murphy, S. M., Flagan, R. C., and Seinfeld, J. H.: Secondary organic aerosol formation from isoprene photooxidation, *Environ. Sci. Technol.*, 40, 1869-1877, DOI 10.1021/es0524301, 2006.
- Lambe, A. T., Onasch, T. B., Croasdale, D. R., Wright, J. P., Martin, A. T., Franklin, J. P., Massoli, P., Kroll, J. H., Canagaratna, M. R., Brune, W. H., Worsnop, D. R., and Davidovits, P.: Transitions from Functionalization to Fragmentation Reactions of Laboratory Secondary Organic Aerosol (SOA) Generated

from the OH Oxidation of Alkane Precursors, *Environ. Sci. Technol.*, 46, 5430-5437, DOI 10.1021/es300274t, 2012.

Lambe, A. T., Chhabra, P. S., Onasch, T. B., Brune, W. H., Hunter, J. F., Kroll, J. H., Cummings, M. J., Brogan, J. F., Parmar, Y., Worsnop, D. R., Kolb, C. E., and Davidovits, P.: Effect of oxidant concentration, exposure time, and seed particles on secondary organic aerosol chemical composition and yield, *Atmos. Chem. Phys.*, 15, 3063-3075, 10.5194/acp-15-3063-2015, 2015.

Lauraguais, A., Coeur-Tourneur, C., Cassez, A., Deboudt, K., Fourmentin, M., and Choel, M.: Atmospheric reactivity of hydroxyl radicals with guaiacol (2-methoxyphenol), a biomass burning emitted compound: Secondary organic aerosol formation and gas-phase oxidation products, *Atmos. Environ.*, 86, 155-163, DOI 10.1016/j.atmosenv.2013.11.074, 2014.

Lee, A., Goldstein, A. H., Kroll, J. H., Ng, N. L., Varutbangkul, V., Flagan, R. C., and Seinfeld, J. H.: Gas-phase products and secondary aerosol yields from the photooxidation of 16 different terpenes, *J. Geophys. Res.*, 111, 10.1029/2006jd007050, 2006.

Li, L., Tang, P., Nakao, S., Chen, C. L., and Cocker, D. R.: Role of methyl group number on SOA formation from monocyclic aromatic hydrocarbons photooxidation under low-NO<sub>x</sub> conditions, *Atmos. Chem. Phys.*, 16, 2255-2272, 10.5194/acp-16-2255-2016, 2016.

Lim, Y. B., and Ziemann, P. J.: Effects of molecular structure on aerosol yields from OH radical-initiated reactions of linear, branched, and cyclic alkanes in the presence of NO<sub>x</sub>, *Environ. Sci. Technol.*, 43, 2328-2334, Doi 10.1021/Es803389s, 2009.

Loza, C. L., Craven, J. S., Yee, L. D., Coggon, M. M., Schwantes, R. H., Shiraiwa, M., Zhang, X., Schilling, K. A., Ng, N. L., Canagaratna, M. R., Ziemann, P. J., Flagan, R. C., and Seinfeld, J. H.: Secondary organic aerosol yields of 12-carbon alkanes, *Atmos. Chem. Phys.*, 14, 1423-1439, DOI 10.5194/acp-14-1423-2014, 2014.

Martin-Reviejo, M., and Wirtz, K.: Is benzene a precursor for secondary organic aerosol?, *Environ. Sci. Technol.*, 39, 1045-1054, DOI 10.1021/es049802a, 2005.

Matsunaga, A., Docherty, K. S., Lim, Y. B., and Ziemann, P. J.: Composition and yields of secondary organic aerosol formed from OH radical-initiated reactions of linear alkenes in the presence of NO<sub>x</sub>: Modeling and measurements, *Atmos. Environ.*, 43, 1349-1357, 2009.

Mutzel, A., Rodigast, M., Iinuma, Y., Boge, O., and Herrmann, H.: Monoterpene SOA - Contribution of first-generation oxidation products to formation and chemical composition, *Atmos. Environ.*, 130, 136-144, 10.1016/j.atmosenv.2015.10.080, 2016.

Nakao, S., Clark, C., Tang, P., Sato, K., and Cocker, D.: Secondary organic aerosol formation from phenolic compounds in the absence of NO<sub>x</sub>, *Atmos. Chem. Phys.*, 11, 10649-10660, 2011.

Ng, N. L., Chhabra, P. S., Chan, A. W. H., Surratt, J. D., Kroll, J. H., Kwan, A. J., McCabe, D. C., Wennberg, P. O., Sorooshian, A., Murphy, S. M., Dalleska, N. F., Flagan, R. C., and Seinfeld, J. H.: Effect of NO<sub>x</sub> level on secondary organic aerosol (SOA) formation from the photooxidation of terpenes, *Atmos. Chem. Phys.*, 7, 5159-5174, 2007a.

Ng, N. L., Kroll, J. H., Chan, A. W. H., Chhabra, P. S., Flagan, R. C., and Seinfeld, J. H.: Secondary organic aerosol formation from m-xylene, toluene, and benzene, *Atmos. Chem. Phys.*, 7, 3909-3922, 2007b.

- Nguyen, T. B., Roach, P. J., Laskin, J., Laskin, A., and Nizkorodov, S. A.: Effect of humidity on the composition of isoprene photooxidation secondary organic aerosol, *Atmos. Chem. Phys.*, 11, 6931-6944, DOI 10.5194/acp-11-6931-2011, 2011.
- Odum, J. R., Hoffmann, T., Bowman, F., Collins, D., Flagan, R. C., and Seinfeld, J. H.: Gas/particle partitioning and secondary organic aerosol yields, *Environ. Sci. Technol.*, 30, 2580-2585, Doi 10.1021/Es950943+, 1996.
- Odum, J. R., Jungkamp, T. P. W., Griffin, R. J., Forstner, H. J. L., Flagan, R. C., and Seinfeld, J. H.: Aromatics, reformulated gasoline, and atmospheric organic aerosol formation, *Environ. Sci. Technol.*, 31, 1890-1897, DOI 10.1021/es9605351, 1997.
- Pandis, S. N., Paulson, S. E., Seinfeld, J. H., and Flagan, R. C.: Aerosol Formation in the Photooxidation of Isoprene and Beta-Pinene, *Atmos Environ a-Gen*, 25, 997-1008, Doi 10.1016/0960-1686(91)90141-S, 1991.
- Presto, A. A., Miracolo, M. A., Donahue, N. M., and Robinson, A. L.: Secondary organic aerosol formation from high-NO<sub>x</sub> photo-oxidation of low volatility precursors: n-Alkanes, *Environ. Sci. Technol.*, 44, 2029-2034, 2010.
- Ruiz, L. H., Paciga, A. L., Cerully, K. M., Nenes, A., Donahue, N. M., and Pandis, S. N.: Formation and aging of secondary organic aerosol from toluene: changes in chemical composition, volatility, and hygroscopicity, *Atmos. Chem. Phys.*, 15, 8301-8313, 10.5194/acp-15-8301-2015, 2015.
- Sato, K., Nakao, S., Clark, C. H., Qi, L., and Cocker, D. R.: Secondary organic aerosol formation from the photooxidation of isoprene, 1,3-butadiene, and 2,3-dimethyl-1,3-butadiene under high NO<sub>x</sub> conditions, *Atmos. Chem. Phys.*, 11, 7301-7317, DOI 10.5194/acp-11-7301-2011, 2011.
- Shakya, K. M., and Griffin, R. J.: Secondary Organic Aerosol from Photooxidation of Polycyclic Aromatic Hydrocarbons, *Environ. Sci. Technol.*, 44, 8134-8139, DOI 10.1021/es1019417, 2010.
- Stern, J. E., Flagan, R. C., Grosjean, D., and Seinfeld, J. H.: Aerosol Formation and Growth in Atmospheric Aromatic Hydrocarbon Photooxidation, *Environ. Sci. Technol.*, 21, 1224-1231, DOI 10.1021/es00165a011, 1987.
- Surratt, J. D., Lewandowski, M., Offenberg, J. H., Jaoui, M., Kleindienst, T. E., Edney, E. O., and Seinfeld, J. H.: Effect of acidity on secondary organic aerosol formation from isoprene, *Environ. Sci. Technol.*, 41, 5363-5369, DOI 10.1021/es0704176, 2007.
- Takekawa, H., Minoura, H., and Yamazaki, S.: Temperature dependence of secondary organic aerosol formation by photo-oxidation of hydrocarbons, *Atmos. Environ.*, 37, 3413-3424, Doi 10.1016/S1352-2310(03)00359-5, 2003.
- Vivanco, M. G., Santiago, M., Martinez-Tarifa, A., Borrás, E., Rodenas, M., Garcia-Diego, C., and Sanchez, M.: SOA formation in a photoreactor from a mixture of organic gases and HONO for different experimental conditions, *Atmos. Environ.*, 45, 708-715, DOI 10.1016/j.atmosenv.2010.09.059, 2011.
- Volkamer, R., Ziemann, P. J., and Molina, M. J.: Secondary Organic Aerosol Formation from Acetylene (C<sub>2</sub>H<sub>2</sub>): seed effect on SOA yields due to organic photochemistry in the aerosol aqueous phase, *Atmos. Chem. Phys.*, 9, 1907-1928, 2009.
- Wang, S. C., Flagan, R. C., and Seinfeld, J. H.: Aerosol Formation and Growth in Atmospheric Organic Nox Systems .2. Aerosol Dynamics, *Atmos Environ a-Gen*, 26, 421-434, Doi 10.1016/0960-1686(92)90327-H, 1992.



Yee, L. D., Kautzman, K. E., Loza, C. L., Schilling, K. A., Coggon, M. M., Chhabra, P. S., Chan, M. N., Chan, A. W. H., Hersey, S. P., Crounse, J. D., Wennberg, P. O., Flagan, R. C., and Seinfeld, J. H.: Secondary organic aerosol formation from biomass burning intermediates: phenol and methoxyphenols, *Atmos. Chem. Phys.*, 13, 8019-8043, 2013.

Yu, Y., Ezell, M. J., Zelenyuk, A., Imre, D., Alexander, L., Ortega, J., D'Anna, B., Harmon, C. W., Johnson, S. N., and Finlayson-Pitts, B. J.: Photooxidation of alpha-pinene at high relative humidity in the presence of increasing concentrations of NO<sub>x</sub>, *Atmos. Environ.*, 42, 5044-5060, DOI 10.1016/j.atmosenv.2008.02.026, 2008.

Zhang, H. F., Lin, Y. H., Zhang, Z. F., Zhang, X. L., Shaw, S. L., Knipping, E. M., Weber, R. J., Gold, A., Kamens, R. M., and Surratt, J. D.: Secondary organic aerosol formation from methacrolein photooxidation: roles of NO<sub>x</sub> level, relative humidity and aerosol acidity, *Environ. Chem.*, 9, 247-262, 10.1071/En12004, 2012.

Zhao, D. F., Kaminski, M., Schlag, P., Fuchs, H., Acir, I. H., Bohn, B., Haseler, R., Kiendler-Scharr, A., Rohrer, F., Tillmann, R., Wang, M. J., Wegener, R., Wildt, J., Wahner, A., and Mentel, T. F.: Secondary organic aerosol formation from hydroxyl radical oxidation and ozonolysis of monoterpenes, *Atmos. Chem. Phys.*, 15, 991-1012, 10.5194/acp-15-991-2015, 2015.

Zhou, Y., Zhang, H. F., Parikh, H. M., Chen, E. H., Rattanavaraha, W., Rosen, E. P., Wang, W. X., and Kamens, R. M.: Secondary organic aerosol formation from xylenes and mixtures of toluene and xylenes in an atmospheric urban hydrocarbon mixture: Water and particle seed effects (II), *Atmos. Environ.*, 45, 3882-3890, DOI 10.1016/j.atmosenv.2010.12.048, 2011.
