# Supplementary material for: Multi-instrument comparison and compilation of non-methane organic gas emissions from biomass burning and implications for smoke-derived secondary organic aerosol precursors
Source: Copernicus journal article supplement (doi:10.5194/acp-17-1471-2017), 2017-01-31
Supplement: Supplementary file 2 [file acp-17-1471-2017-supplement.zip]

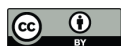

*Supplement of*

## **Multi-instrument comparison and compilation of non-methane organic gas emissions from biomass burning and implications for smoke-derived secondary organic aerosol precursors**

**Lindsay E. Hatch et al.**

*Correspondence to:* Kelley C. Barsanti (kbarsanti@engr.ucr.edu)

- [acp-17-1471-2017-supplement-title-page.pdf](#)
- Supplement
  - [Table S1.xlsx](#)
  - [acp-2016-598\\_Supplement.pdf](#)

The copyright of individual parts of the supplement might differ from the CC-BY 3.0 licence.
